# Supplementary material for: Cloning, Expression, and Functional Analysis of the Compact <em>Anoxybacillus flavithermus </em>Cas9 Nuclease
Source: Preprints.org preprint supplement (doi:10.20944/preprints202310.2063.v1), 2023-10-31
Supplement: Supplementary file 2 [file Supplementary Tables.docx]

**Table S1.** Amplification primers used for the generation of FAM-labeled dsDNA PAM-templates.

| **Name** | **Structure (5’-3’)** |
| --- | --- |
| Uni-Spacer-F | caagaaggagatgtctggggatgtcagggatgcatttgtggccat |
| FAM-Uni-R | ttctcatctgtgccagcacccttcatggatttgtaaagtttgtcggcaaagaagaga |
| Spacer-PAM-R_1 | ttgtcggcaaagaagagaggcttgttcttgacactttgaacaatggccacaaatgcatc |
| Spacer-PAM-R_2 | ttgtcggcaaagaagagaggcttgttcttgacacttggaacaatggccacaaatgcatc |
| Spacer-PAM-R_3 | ttgtcggcaaagaagagaggcttgttcttgacacttcgaacaatggccacaaatgcatc |
| Spacer-PAM-R_4 | ttgtcggcaaagaagagaggcttgttcttgacacttagaacaatggccacaaatgcatc |
| Spacer-PAM-R_5 | ttgtcggcaaagaagagaggcttgttcttgacactttgatcaatggccacaaatgcatc |
| Spacer-PAM-R_6 | ttgtcggcaaagaagagaggcttgttcttgacacttggatcaatggccacaaatgcatc |
| Spacer-PAM-R_7 | ttgtcggcaaagaagagaggcttgttcttgacacttcgatcaatggccacaaatgcatc |
| Spacer-PAM-R_8 | ttgtcggcaaagaagagaggcttgttcttgacacttagatcaatggccacaaatgcatc |
| Spacer-PAM-R_9 | ttgtcggcaaagaagagaggcttgttcttgacactttgagcaatggccacaaatgcatc |
| Spacer-PAM-R_10 | ttgtcggcaaagaagagaggcttgttcttgacacttggagcaatggccacaaatgcatc |
| Spacer-PAM-R_11 | ttgtcggcaaagaagagaggcttgttcttgacacttcgagcaatggccacaaatgcatc |
| Spacer-PAM-R_12 | ttgtcggcaaagaagagaggcttgttcttgacacttagagcaatggccacaaatgcatc |
| Spacer-PAM-R_13 | ttgtcggcaaagaagagaggcttgttcttgacactttgaccaatggccacaaatgcatc |
| Spacer-PAM-R_14 | ttgtcggcaaagaagagaggcttgttcttgacacttggaccaatggccacaaatgcatc |
| Spacer-PAM-R_15 | ttgtcggcaaagaagagaggcttgttcttgacacttcgaccaatggccacaaatgcatc |
| Spacer-PAM-R_16 | ttgtcggcaaagaagagaggcttgttcttgacacttagaccaatggccacaaatgcatc |
| Spacer-PAM-R_18 | ttgtcggcaaagaagagaggcttgttcttgacacgtcgaccaatggccacaaatgcatc |
| Spacer-PAM-R_19 | ttgtcggcaaagaagagaggcttgttcttgacacctcgaccaatggccacaaatgcatc |
| Spacer-PAM-R_20 | ttgtcggcaaagaagagaggcttgttcttgacacatcgaccaatggccacaaatgcatc |
| Spacer-PAM-R_21 | ttgtcggcaaagaagagaggcttgttcttgacacttcgacctatggccacaaatgcatc |
| Spacer-PAM-R_22 | ttgtcggcaaagaagagaggcttgttcttgacacgtcgacctatggccacaaatgcatc |
| Spacer-PAM-R_23 | ttgtcggcaaagaagagaggcttgttcttgacacctcgacctatggccacaaatgcatc |
| Spacer-PAM-R_24 | ttgtcggcaaagaagagaggcttgttcttgacacatcgacctatggccacaaatgcatc |
| Spacer-PAM-R_25 | ttgtcggcaaagaagagaggcttgttcttgacacttcgaccgatggccacaaatgcatc |
| Spacer-PAM-R_26 | ttgtcggcaaagaagagaggcttgttcttgacacgtcgaccgatggccacaaatgcatc |
| Spacer-PAM-R_27 | ttgtcggcaaagaagagaggcttgttcttgacacctcgaccgatggccacaaatgcatc |
| Spacer-PAM-R_28 | ttgtcggcaaagaagagaggcttgttcttgacacatcgaccgatggccacaaatgcatc |
| Spacer-PAM-R_29 | ttgtcggcaaagaagagaggcttgttcttgacacttcgacccatggccacaaatgcatc |
| Spacer-PAM-R_30 | ttgtcggcaaagaagagaggcttgttcttgacacgtcgacccatggccacaaatgcatc |
| Spacer-PAM-R_31 | ttgtcggcaaagaagagaggcttgttcttgacacctcgacccatggccacaaatgcatc |
| Spacer-PAM-R_32 | ttgtcggcaaagaagagaggcttgttcttgacacatcgacccatggccacaaatgcatc |
| Spacer-PAM-R_33 | ttgtcggcaaagaagagaggcttgttcttgacacttcgtcttatggccacaaatgcatc |
| Spacer-PAM-R_34 | ttgtcggcaaagaagagaggcttgttcttgacacttcgtcgtatggccacaaatgcatc |
| Spacer-PAM-R_35 | ttgtcggcaaagaagagaggcttgttcttgacacttcgtcctatggccacaaatgcatc |
| Spacer-PAM-R_36 | ttgtcggcaaagaagagaggcttgttcttgacacttcgtcatatggccacaaatgcatc |
| Spacer-PAM-R_37 | ttgtcggcaaagaagagaggcttgttcttgacacttcggcttatggccacaaatgcatc |
| Spacer-PAM-R_38 | ttgtcggcaaagaagagaggcttgttcttgacacttcggcgtatggccacaaatgcatc |
| Spacer-PAM-R_39 | ttgtcggcaaagaagagaggcttgttcttgacacttcggcctatggccacaaatgcatc |
| Spacer-PAM-R_40 | ttgtcggcaaagaagagaggcttgttcttgacacttcggcatatggccacaaatgcatc |
| Spacer-PAM-R_41 | ttgtcggcaaagaagagaggcttgttcttgacacttcgccttatggccacaaatgcatc |
| Spacer-PAM-R_42 | ttgtcggcaaagaagagaggcttgttcttgacacttcgccgtatggccacaaatgcatc |
| Spacer-PAM-R_43 | ttgtcggcaaagaagagaggcttgttcttgacacttcgccctatggccacaaatgcatc |
| Spacer-PAM-R_44 | ttgtcggcaaagaagagaggcttgttcttgacacttcgccatatggccacaaatgcatc |
| Spacer-PAM-R_45 | ttgtcggcaaagaagagaggcttgttcttgacacttcgacttatggccacaaatgcatc |
| Spacer-PAM-R_46 | ttgtcggcaaagaagagaggcttgttcttgacacttcgacgtatggccacaaatgcatc |
| Spacer-PAM-R_48 | ttgtcggcaaagaagagaggcttgttcttgacacttcgacatatggccacaaatgcatc |
| Spacer-PAM-R_33 | ttgtcggcaaagaagagaggcttgttcttgacacttcgtcttatggccacaaatgcatc |

**Table S2.** Sequences of CRISPR array elements derived from the *Anoxybacillus flavithermus* genome.

| **Name** | **Structure (5’-3’)** |
| --- | --- |
| CRISPR repeat | gtaatagttcccctgaggttattgctgtgttatgat |
| CRISPR spacer 1 | aaaatgacacacttatttgataaaaagaaa |
| CRISPR spacer 2 | ccgaaagttttagactcactataaatcctc |
| CRISPR spacer 3 | aaaaaggagatcatgaaaaaagcagtagct |
| CRISPR spacer 4 | cgtgggtcaattcggtaaatggaagttttt |
| CRISPR spacer 5 | tgctacacttttgcaccgaaacggagcgga |
| CRISPR spacer 6 | agaccagtccaactagaaattaattttaga |
| CRISPR spacer 7 | tgaagaaaaagaaaactgtagagaaacaac |
| CRISPR spacer 8 | tcatcagcaaaaatgtatagcgagaacggc |
| CRISPR spacer 9 | tttctgtctagcagaacaactatttctgaa |
| CRISPR spacer 10 | tttgctactatgatagaaagaacattagtg |
| CRISPR spacer 11 | tttctgtctagcagaacaactatttccgaa |
| CRISPR spacer 12 | tttctgtctagcagaacaactatttcggcg |
| CRISPR spacer 13 | cagaaagggttggaaggtgattcgatgaag |
| CRISPR spacer 14 | ccaaattcatgttttaagaacccgctgata |
| CRISPR spacer 15 | atcatttaacgtcttactgatccgcgtatt |
| CRISPR spacer 16 | tggtggtgatatgcctaataacgaattaaa |

**Table S3.** Structure of dsDNA templates used as a library to determine AnoCas9 PAM specificity. The PAM motif is highlighted in green.

| **Name** | **Structure (5’-3’)** |
| --- | --- |
| Spacer-PAM _1 | CAAGAAGGAGATGTCTGGGGATGTCAGGGATGCATTTGTGGCCATTGTTCAAAGTGTCAAGAACAAGCCTCTCTTCTTTGCCGACAAACTTTACAAATCCATGAAGGGTGCTGGCACAGATGAGAA |
| Spacer-PAM _2 | CAAGAAGGAGATGTCTGGGGATGTCAGGGATGCATTTGTGGCCATTGTTCCAAGTGTCAAGAACAAGCCTCTCTTCTTTGCCGACAAACTTTACAAATCCATGAAGGGTGCTGGCACAGATGAGAA |
| Spacer-PAM _3 | CAAGAAGGAGATGTCTGGGGATGTCAGGGATGCATTTGTGGCCATTGTTCGAAGTGTCAAGAACAAGCCTCTCTTCTTTGCCGACAAACTTTACAAATCCATGAAGGGTGCTGGCACAGATGAGAA |
| Spacer-PAM _4 | CAAGAAGGAGATGTCTGGGGATGTCAGGGATGCATTTGTGGCCATTGTTCTAAGTGTCAAGAACAAGCCTCTCTTCTTTGCCGACAAACTTTACAAATCCATGAAGGGTGCTGGCACAGATGAGAA |
| Spacer-PAM _5 | CAAGAAGGAGATGTCTGGGGATGTCAGGGATGCATTTGTGGCCATTGATCAAAGTGTCAAGAACAAGCCTCTCTTCTTTGCCGACAAACTTTACAAATCCATGAAGGGTGCTGGCACAGATGAGAA |
| Spacer-PAM _6 | CAAGAAGGAGATGTCTGGGGATGTCAGGGATGCATTTGTGGCCATTGATCCAAGTGTCAAGAACAAGCCTCTCTTCTTTGCCGACAAACTTTACAAATCCATGAAGGGTGCTGGCACAGATGAGAA |
| Spacer-PAM _7 | CAAGAAGGAGATGTCTGGGGATGTCAGGGATGCATTTGTGGCCATTGATCGAAGTGTCAAGAACAAGCCTCTCTTCTTTGCCGACAAACTTTACAAATCCATGAAGGGTGCTGGCACAGATGAGAA |
| Spacer-PAM _8 | CAAGAAGGAGATGTCTGGGGATGTCAGGGATGCATTTGTGGCCATTGATCTAAGTGTCAAGAACAAGCCTCTCTTCTTTGCCGACAAACTTTACAAATCCATGAAGGGTGCTGGCACAGATGAGAA |
| Spacer-PAM _9 | CAAGAAGGAGATGTCTGGGGATGTCAGGGATGCATTTGTGGCCATTGCTCAAAGTGTCAAGAACAAGCCTCTCTTCTTTGCCGACAAACTTTACAAATCCATGAAGGGTGCTGGCACAGATGAGAA |
| Spacer-PAM _10 | CAAGAAGGAGATGTCTGGGGATGTCAGGGATGCATTTGTGGCCATTGCTCCAAGTGTCAAGAACAAGCCTCTCTTCTTTGCCGACAAACTTTACAAATCCATGAAGGGTGCTGGCACAGATGAGAA |
| Spacer-PAM _11 | CAAGAAGGAGATGTCTGGGGATGTCAGGGATGCATTTGTGGCCATTGCTCGAAGTGTCAAGAACAAGCCTCTCTTCTTTGCCGACAAACTTTACAAATCCATGAAGGGTGCTGGCACAGATGAGAA |
| Spacer-PAM _12 | CAAGAAGGAGATGTCTGGGGATGTCAGGGATGCATTTGTGGCCATTGCTCTAAGTGTCAAGAACAAGCCTCTCTTCTTTGCCGACAAACTTTACAAATCCATGAAGGGTGCTGGCACAGATGAGAA |
| Spacer-PAM _13 | CAAGAAGGAGATGTCTGGGGATGTCAGGGATGCATTTGTGGCCATTGGTCAAAGTGTCAAGAACAAGCCTCTCTTCTTTGCCGACAAACTTTACAAATCCATGAAGGGTGCTGGCACAGATGAGAA |
| Spacer-PAM _14 | CAAGAAGGAGATGTCTGGGGATGTCAGGGATGCATTTGTGGCCATTGGTCCAAGTGTCAAGAACAAGCCTCTCTTCTTTGCCGACAAACTTTACAAATCCATGAAGGGTGCTGGCACAGATGAGAA |
| Spacer-PAM _15 | CAAGAAGGAGATGTCTGGGGATGTCAGGGATGCATTTGTGGCCATTGGTCGAAGTGTCAAGAACAAGCCTCTCTTCTTTGCCGACAAACTTTACAAATCCATGAAGGGTGCTGGCACAGATGAGAA |
| Spacer-PAM _16 | CAAGAAGGAGATGTCTGGGGATGTCAGGGATGCATTTGTGGCCATTGGTCTAAGTGTCAAGAACAAGCCTCTCTTCTTTGCCGACAAACTTTACAAATCCATGAAGGGTGCTGGCACAGATGAGAA |
| Spacer-PAM _18 | CAAGAAGGAGATGTCTGGGGATGTCAGGGATGCATTTGTGGCCATTGGTCGACGTGTCAAGAACAAGCCTCTCTTCTTTGCCGACAAACTTTACAAATCCATGAAGGGTGCTGGCACAGATGAGAA |
| Spacer-PAM _19 | CAAGAAGGAGATGTCTGGGGATGTCAGGGATGCATTTGTGGCCATTGGTCGAGGTGTCAAGAACAAGCCTCTCTTCTTTGCCGACAAACTTTACAAATCCATGAAGGGTGCTGGCACAGATGAGAA |
| Spacer-PAM _20 | CAAGAAGGAGATGTCTGGGGATGTCAGGGATGCATTTGTGGCCATTGGTCGATGTGTCAAGAACAAGCCTCTCTTCTTTGCCGACAAACTTTACAAATCCATGAAGGGTGCTGGCACAGATGAGAA |
| Spacer-PAM _21 | CAAGAAGGAGATGTCTGGGGATGTCAGGGATGCATTTGTGGCCATAGGTCGAAGTGTCAAGAACAAGCCTCTCTTCTTTGCCGACAAACTTTACAAATCCATGAAGGGTGCTGGCACAGATGAGAA |
| Spacer-PAM _22 | CAAGAAGGAGATGTCTGGGGATGTCAGGGATGCATTTGTGGCCATAGGTCGACGTGTCAAGAACAAGCCTCTCTTCTTTGCCGACAAACTTTACAAATCCATGAAGGGTGCTGGCACAGATGAGAA |
| Spacer-PAM _23 | CAAGAAGGAGATGTCTGGGGATGTCAGGGATGCATTTGTGGCCATAGGTCGAGGTGTCAAGAACAAGCCTCTCTTCTTTGCCGACAAACTTTACAAATCCATGAAGGGTGCTGGCACAGATGAGAA |
| Spacer-PAM _24 | CAAGAAGGAGATGTCTGGGGATGTCAGGGATGCATTTGTGGCCATAGGTCGATGTGTCAAGAACAAGCCTCTCTTCTTTGCCGACAAACTTTACAAATCCATGAAGGGTGCTGGCACAGATGAGAA |
| Spacer-PAM _25 | CAAGAAGGAGATGTCTGGGGATGTCAGGGATGCATTTGTGGCCATCGGTCGAAGTGTCAAGAACAAGCCTCTCTTCTTTGCCGACAAACTTTACAAATCCATGAAGGGTGCTGGCACAGATGAGAA |
| Spacer-PAM _26 | CAAGAAGGAGATGTCTGGGGATGTCAGGGATGCATTTGTGGCCATCGGTCGACGTGTCAAGAACAAGCCTCTCTTCTTTGCCGACAAACTTTACAAATCCATGAAGGGTGCTGGCACAGATGAGAA |
| Spacer-PAM _27 | CAAGAAGGAGATGTCTGGGGATGTCAGGGATGCATTTGTGGCCATCGGTCGAGGTGTCAAGAACAAGCCTCTCTTCTTTGCCGACAAACTTTACAAATCCATGAAGGGTGCTGGCACAGATGAGAA |
| Spacer-PAM _28 | CAAGAAGGAGATGTCTGGGGATGTCAGGGATGCATTTGTGGCCATCGGTCGATGTGTCAAGAACAAGCCTCTCTTCTTTGCCGACAAACTTTACAAATCCATGAAGGGTGCTGGCACAGATGAGAA |
| Spacer-PAM _29 | CAAGAAGGAGATGTCTGGGGATGTCAGGGATGCATTTGTGGCCATGGGTCGAAGTGTCAAGAACAAGCCTCTCTTCTTTGCCGACAAACTTTACAAATCCATGAAGGGTGCTGGCACAGATGAGAA |
| Spacer-PAM _30 | CAAGAAGGAGATGTCTGGGGATGTCAGGGATGCATTTGTGGCCATGGGTCGACGTGTCAAGAACAAGCCTCTCTTCTTTGCCGACAAACTTTACAAATCCATGAAGGGTGCTGGCACAGATGAGAA |
| Spacer-PAM _31 | CAAGAAGGAGATGTCTGGGGATGTCAGGGATGCATTTGTGGCCATGGGTCGAGGTGTCAAGAACAAGCCTCTCTTCTTTGCCGACAAACTTTACAAATCCATGAAGGGTGCTGGCACAGATGAGAA |
| Spacer-PAM _32 | CAAGAAGGAGATGTCTGGGGATGTCAGGGATGCATTTGTGGCCATGGGTCGATGTGTCAAGAACAAGCCTCTCTTCTTTGCCGACAAACTTTACAAATCCATGAAGGGTGCTGGCACAGATGAGAA |
| Spacer-PAM-R_33 | CAAGAAGGAGATGTCTGGGGATGTCAGGGATGCATTTGTGGCCATAAGACGAAGTGTCAAGAACAAGCCTCTCTTCTTTGCCGACAAACTTTACAAATCCATGAAGGGTGCTGGCACAGATGAGAA |
| Spacer-PAM-R_34 | CAAGAAGGAGATGTCTGGGGATGTCAGGGATGCATTTGTGGCCATACGACGAAGTGTCAAGAACAAGCCTCTCTTCTTTGCCGACAAACTTTACAAATCCATGAAGGGTGCTGGCACAGATGAGAA |
| Spacer-PAM-R_35 | CAAGAAGGAGATGTCTGGGGATGTCAGGGATGCATTTGTGGCCATAGGACGAAGTGTCAAGAACAAGCCTCTCTTCTTTGCCGACAAACTTTACAAATCCATGAAGGGTGCTGGCACAGATGAGAA |
| Spacer-PAM-R_36 | CAAGAAGGAGATGTCTGGGGATGTCAGGGATGCATTTGTGGCCATATGACGAAGTGTCAAGAACAAGCCTCTCTTCTTTGCCGACAAACTTTACAAATCCATGAAGGGTGCTGGCACAGATGAGAA |
| Spacer-PAM-R_37 | CAAGAAGGAGATGTCTGGGGATGTCAGGGATGCATTTGTGGCCATAAGCCGAAGTGTCAAGAACAAGCCTCTCTTCTTTGCCGACAAACTTTACAAATCCATGAAGGGTGCTGGCACAGATGAGAA |
| Spacer-PAM-R_38 | CAAGAAGGAGATGTCTGGGGATGTCAGGGATGCATTTGTGGCCATACGCCGAAGTGTCAAGAACAAGCCTCTCTTCTTTGCCGACAAACTTTACAAATCCATGAAGGGTGCTGGCACAGATGAGAA |
| Spacer-PAM-R_39 | CAAGAAGGAGATGTCTGGGGATGTCAGGGATGCATTTGTGGCCATAGGCCGAAGTGTCAAGAACAAGCCTCTCTTCTTTGCCGACAAACTTTACAAATCCATGAAGGGTGCTGGCACAGATGAGAA |
| Spacer-PAM-R_40 | CAAGAAGGAGATGTCTGGGGATGTCAGGGATGCATTTGTGGCCATATGCCGAAGTGTCAAGAACAAGCCTCTCTTCTTTGCCGACAAACTTTACAAATCCATGAAGGGTGCTGGCACAGATGAGAA |
| Spacer-PAM-R_41 | CAAGAAGGAGATGTCTGGGGATGTCAGGGATGCATTTGTGGCCATAAGGCGAAGTGTCAAGAACAAGCCTCTCTTCTTTGCCGACAAACTTTACAAATCCATGAAGGGTGCTGGCACAGATGAGAA |
| Spacer-PAM-R_42 | CAAGAAGGAGATGTCTGGGGATGTCAGGGATGCATTTGTGGCCATACGGCGAAGTGTCAAGAACAAGCCTCTCTTCTTTGCCGACAAACTTTACAAATCCATGAAGGGTGCTGGCACAGATGAGAA |
| Spacer-PAM-R_43 | CAAGAAGGAGATGTCTGGGGATGTCAGGGATGCATTTGTGGCCATAGGGCGAAGTGTCAAGAACAAGCCTCTCTTCTTTGCCGACAAACTTTACAAATCCATGAAGGGTGCTGGCACAGATGAGAA |
| Spacer-PAM-R_44 | CAAGAAGGAGATGTCTGGGGATGTCAGGGATGCATTTGTGGCCATATGGCGAAGTGTCAAGAACAAGCCTCTCTTCTTTGCCGACAAACTTTACAAATCCATGAAGGGTGCTGGCACAGATGAGAA |
| Spacer-PAM-R_45 | CAAGAAGGAGATGTCTGGGGATGTCAGGGATGCATTTGTGGCCATAAGTCGAAGTGTCAAGAACAAGCCTCTCTTCTTTGCCGACAAACTTTACAAATCCATGAAGGGTGCTGGCACAGATGAGAA |
| Spacer-PAM-R_46 | CAAGAAGGAGATGTCTGGGGATGTCAGGGATGCATTTGTGGCCATACGTCGAAGTGTCAAGAACAAGCCTCTCTTCTTTGCCGACAAACTTTACAAATCCATGAAGGGTGCTGGCACAGATGAGAA |
| Spacer-PAM-R_48 | CAAGAAGGAGATGTCTGGGGATGTCAGGGATGCATTTGTGGCCATATGTCGAAGTGTCAAGAACAAGCCTCTCTTCTTTGCCGACAAACTTTACAAATCCATGAAGGGTGCTGGCACAGATGAGAA |
